# Supplementary material for: Consumption of fortified infant foods reduces dietary diversity but has a positive effect on subsequent growth in infants from Sumedang district, Indonesia
Source: PubMed Central journal article supplement (PMC5398566; doi:10.1371/journal.pone.0175952), 2017-04-20
Supplement: pone.0175952.s002.pdf [file pone.0175952.s002.pdf]

**S1 Table. Number and percentage of infants meeting five core WHO complementary feeding indicators and consuming four sentinel food groups at 6, 9, and 12 months on day 1**

| WHO IYCF Indicator                                   | 6 mo<br>n=218 | 9 mo<br>n=193 | 12 mo<br>n=186 |
|------------------------------------------------------|---------------|---------------|----------------|
| Introduction of solid, semi-solid, or soft foods     | 217 (99.5)    | NA            | NA             |
| Minimum dietary diversity ( $\geq 4$ food groups)    | 3 (1.4)       | 44 (22.8)     | 70 (37.6)      |
| Minimum meal frequency                               | 190 (87.2)    | 180 (93.3)    | 182 (97.8)     |
| Minimum acceptable diet                              | 3 (1.4)       | 44 (22.8)     | 69 (37.1)      |
| Consumption of iron-rich/iron fortified infant foods | 193 (88.5)    | 117 (60.6)    | 117 (62.9)     |
| <b>Sentinel food groups</b>                          |               |               |                |
| Dairy products                                       | 8 (3.7)       | 3 (1.6)       | 6 (3.2)        |
| Flesh foods                                          | 2 (0.9)       | 74 (38.3)     | 104 (55.9)     |
| Eggs                                                 | 1 (0.5)       | 40 (20.7)     | 59 (31.7)      |
| Animal-source foods                                  | 11 (5.0)      | 97 (50.3)     | 133 (71.5)     |
| Fortified infant foods                               | 192 (88.1)    | 55 (28.5)     | 18 (9.7)       |
